# Supplementary material for: A new matrix of MALDI-TOF MS for the analysis of thiolate-protected gold clusters
Source: Royal Society of Chemistry journal article supplement (doi:10.1039/c2ay26013a), 2012-01-01
Supplement: c2ay26013a.pdf [file c2ay26013a.pdf]

## *Electronic Supplementary Information (ESI)*

# New matrix of MALDI-TOF MS for the analysis of thiolate-protected gold clusters

*Haruki Kouchi, Hideya Kawasaki\* and Ryuichi Arakawa*

Department of Chemistry and Materials Engineering, Faculty of Chemistry, Materials and  
Bioengineering, Kansai University 3-3-35, Yamate-cho, Suita-shi, Osaka 564-8680, Japan

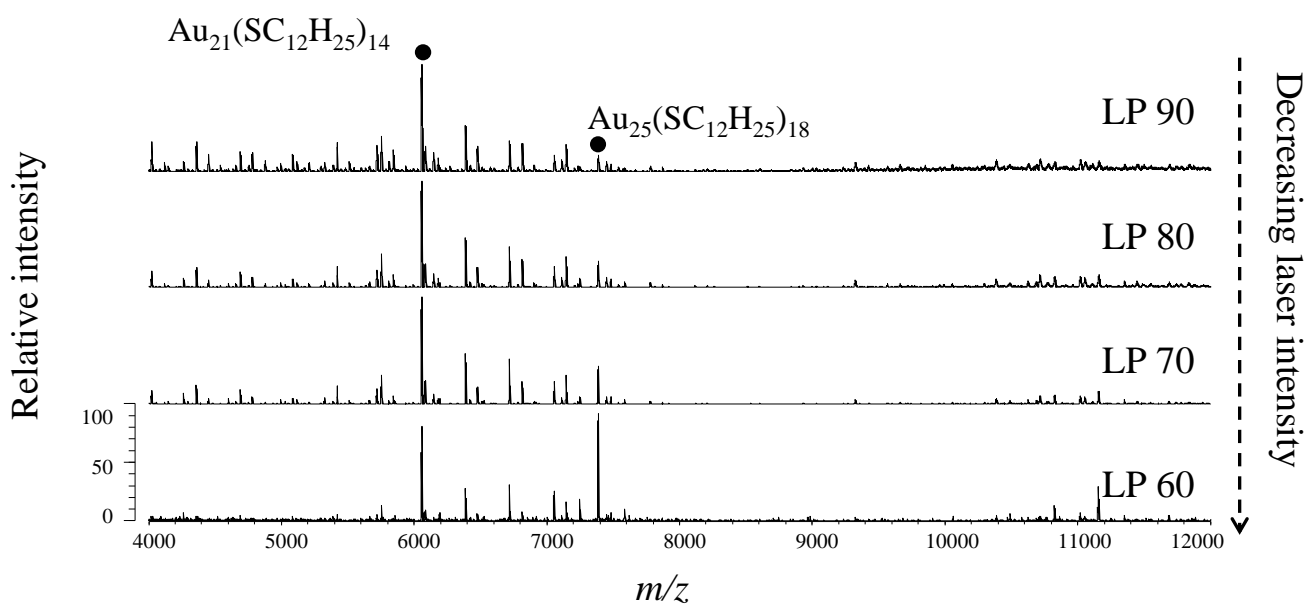

**Figure S1.** MALDI mass spectra of  $\text{Au}_{25}(\text{SCH}_2\text{CH}_2\text{Ph})_{18}$  in positive ion mode as a function of LP using a DPF matrix.

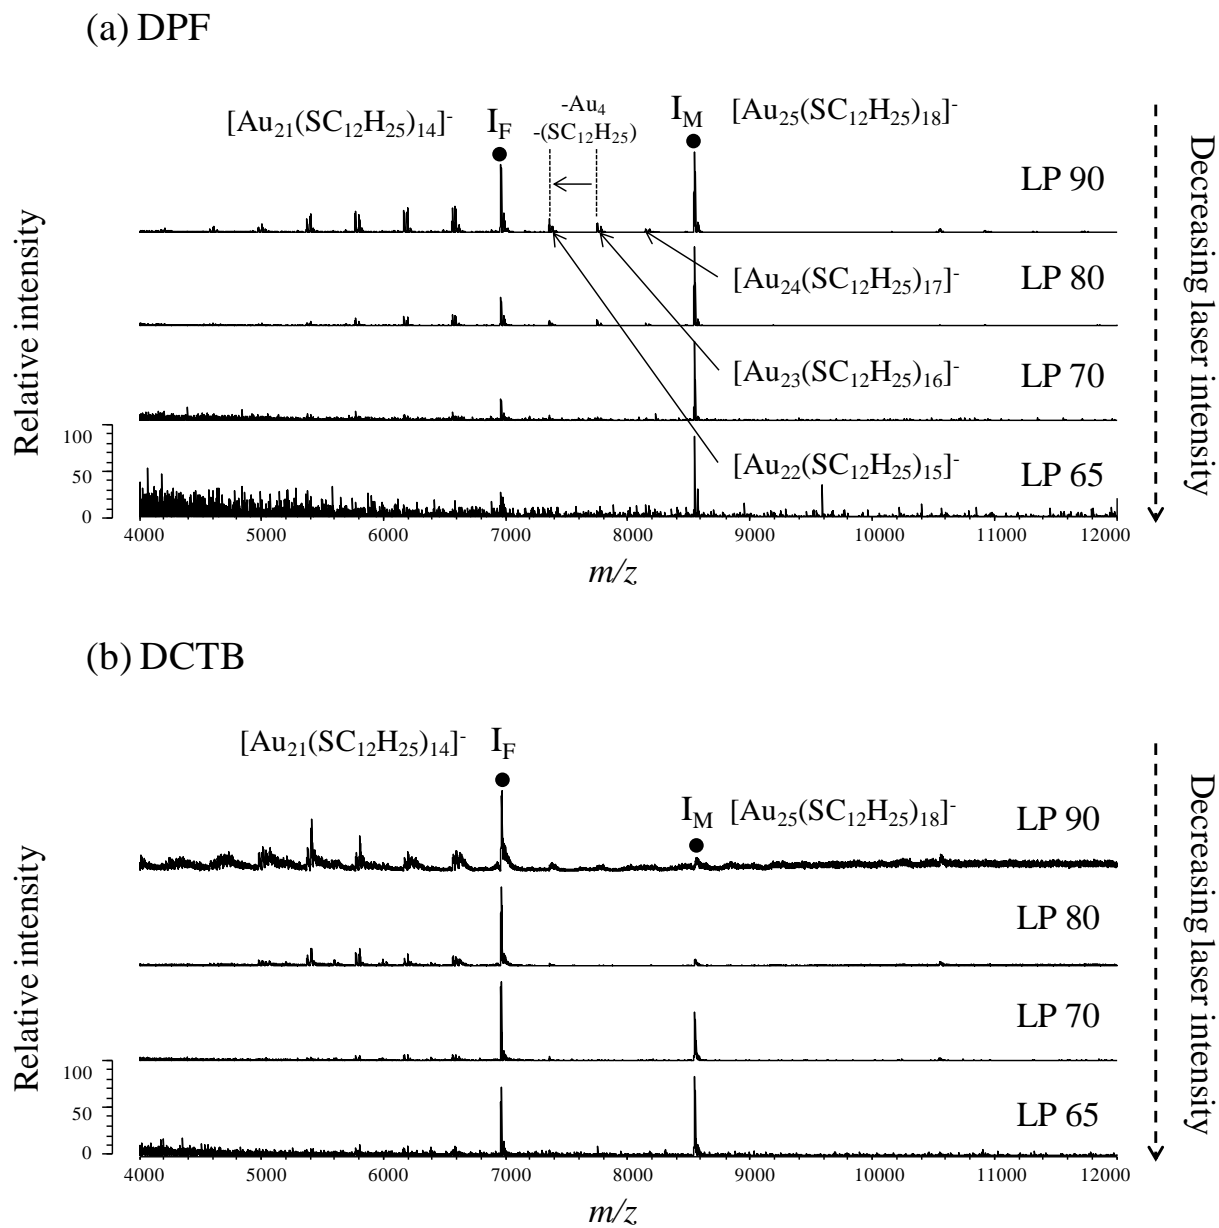

**Figure S2.** MALDI mass spectra of  $Au_{25}(SC_{12}H_{25})_{18}$  under negative ion mode as a function of LP using several MALDI matrixes: (a) DPF; and (b) DCTB.

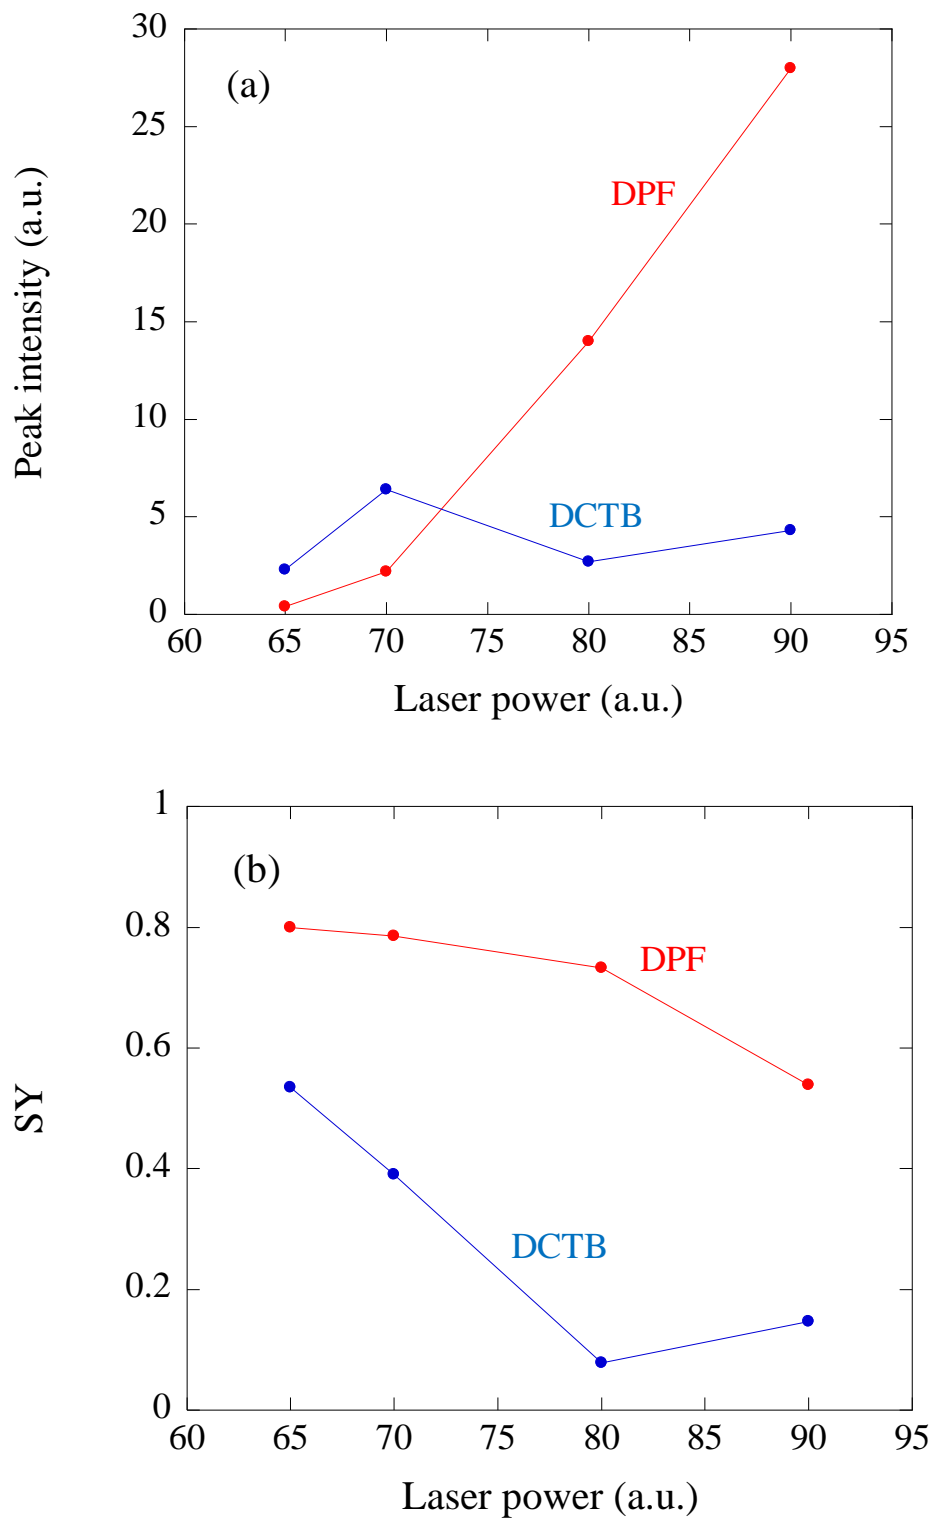

**Figure S3.** (a) Survival yield (SY) values; and (b) peak intensities of  $\text{Au}_{25}(\text{SC}_{12}\text{H}_{25})_{18}$  as a function of LP.

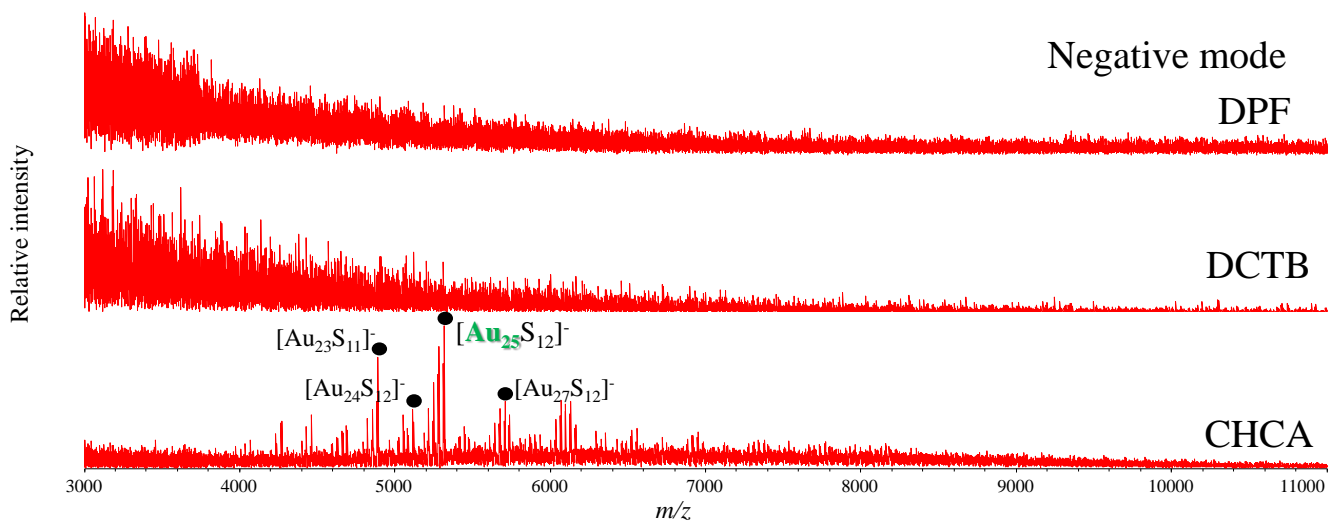

**Figure S4.** MALDI mass spectra of Au<sub>25</sub>(SG)<sub>18</sub> under negative ion mode as a function of LP using several MALDI matrixes: DPF, DCTB and CHCA.
